# Supplementary material
Source: Elsevier journal article supplement (https://www.sciencedirect.com/science/article/pii/S0213911119300792)
Supplement: mmc1 [file S0213911119300792:mmc1.docx]

**Apéndice**

**Tabla I**

Enunciado de las preguntas del cuestionario

| **P.1** | ¿Sabe cuál es el reconocimiento que el ordenamiento jurídico español hace de la objeción de conciencia en el ámbito sanitario?   - Sí. - No. - NS/NC. |
| --- | --- |
| **P.2.a)** | Si en su futuro laboral como profesional de la salud la obligatoriedad de la práctica de una intervención médica entra en directa confrontación con una convicción personal suya, ¿cómo actuaría?   - Abandonaría ese puesto de trabajo. - Protestaría e intentaría que se me eximiese de la ejecución de esa práctica sanitaria. - Obedecería sin protestar. - NS/NC. |
| **P.2.b)** | De optar por la segunda opción en la pregunta **P.2.a)** –*Protestaría…*–, ¿considera que serviría de algo?   - Sí. - No. - NS/NC. |
| **P.3** | ¿Considera que el personal médico debería tener derecho a la objeción de conciencia en cualquier práctica sanitaria?   - Sí. - No. - NS/NC. |
| **P.4** | ¿Considera que una objeción de conciencia médica practicada por un amplio porcentaje de profesionales de la salud puede hacer peligrar el derecho constitucional de los/las pacientes a la protección de su salud –art. 43 CE–?   - Sí. - No. - NS/NC. |
| **P.5** | ¿Considera adecuado reconocer a una oficina de farmacia el derecho de objeción de conciencia a disponer y a dispensar en su establecimiento la llamada “píldora del día después”?   - Sí. - No. - NS/NC. |
| **P.6** | El art. 19.2 de la *Ley 2/2010, de 3 de marzo, de salud sexual y reproductiva y de la interrupción voluntaria del embarazo* (IVE) reconoce el derecho a ejercer la objeción de conciencia al personal sanitario directamente implicado en esta intervención. ¿Tenía conocimiento del reconocimiento de este derecho?   - Sí. - No. - NS/NC. |
| **P.7.a)** | ¿Se muestra a favor del reconocimiento de este derecho para el personal médico?   - Sí. - No. - NS/NC. |
| **P.7.b)** | De optar por la segunda opción en la **P.7.a)**, ¿está a favor de modificar esta ley para prohibir la objeción de conciencia a la práctica de la IVE?   - Sí. - No. - NS/NC. |
| **P.8.a)** | Si Ud. se decidiese por la especialidad de ginecología y obstetricia, ¿ejercería la objeción de conciencia a la IVE?   - Sí. - No. - NS/NC. |
| **P.8.b)** | De ser afirmativa la respuesta a la pregunta **P.8.a)**, ¿a qué fase del embarazo ejercería la objeción?   - A cualquiera que fuese la semana de gestación. - A gestaciones de menos de 14 semanas. - A gestaciones entre 14 y 22 semanas. - A gestaciones de más de 22 semanas. - NS/NC. |
| **P.9** | ¿Dónde cree que es más fácil ejercer el derecho a la objeción de conciencia a la IVE: en la sanidad pública o en la privada?   - En la sanidad pública. - En la sanidad privada. - NS/NC. |
| **P.10** | ¿Sería un impedimento para Ud. el hecho de tener que declararse obligatoriamente como objetor/a de conciencia en un registro público de objeción de conciencia a la práctica de la IVE?   - Sí. - No. - NS/NC. |
| **P.11** | Según su criterio, ¿cómo debería ser el registro público de objetores de conciencia a la IVE?   - Anónimo. - Nominativo. - NS/NC. |
| **P.12** | De optar por trabajar en la sanidad pública, a la hora de decidir en qué comunidad autónoma (CA) desea trabajar, ¿cuál sería su primera opción?   - Una CA en la que no esté regulado el registro de objeción. - Una CA en la que sí esté regulado dicho registro. - Me resultaría indiferente. - Tendría como primera opción otros motivos. - NS/NC. |
| **P.13** | ¿Considera que deberían hacerse públicos datos tales como cuál es la proporción de personal médico objetor de conciencia en cada centro sanitario público acreditado para la práctica de la IVE, en cada provincia o en cada CA?   - Sí. - No. - NS/NC. |
| **P.14** | Sabiendo que en la sanidad pública está incluida en su oferta de servicios la IVE, hecho conocido por todo el personal médico incluso antes de su ingreso en la profesión, ¿pese a ello le parece razonable que se ejerza la objeción de conciencia en intervenciones como la IVE?   - Sí. - No. - NS/NC. |
| **P.15** | ¿Cree que la objeción de conciencia médica a la IVE puede afectar negativamente –costes económicos y psicológicos, daños físicos y morales, etc.– a aquellas gestantes que son derivadas desde la sanidad pública gallega a otros centros dentro o fuera de Galicia?   - Sí. - No. - NS/NC. |
